# Supplementary material for: Promotion of autophagosome–lysosome fusion via salvianolic acid A-mediated SIRT1 up-regulation ameliorates alcoholic liver disease
Source: Royal Society of Chemistry journal article supplement (doi:10.1039/c8ra00798e), 2018-01-01
Supplement: c8ra00798e1.pdf [file c8ra00798e1.pdf]

**Supplementary Fig. 1 siRNA-mediated the knockdown of SIRT1 inhibits the fusion of AV-lysosome.** SIRT1, LAMP-2, and RAB7 protein expression levels in AML-12 cells were evaluated by Western blotting after transfection with a negative control or SIRT1-specific siRNA. The results are expressed as the mean±S.D. \*\* $P < 0.01$  versus the control group (n=3).

**Supplementary Fig. 2 SalA and chronic ethanol co-treatment increase the expressions of the lysosomal marker proteins.** AML-12 cells were treated with or without SalA (50  $\mu$ M) and ethanol (100 mM) for 24 h. The protein levels of LAMP-2 and RAB7 were evaluated by Western blotting. \* $P < 0.05$  versus the control group, \*\*\* $P < 0.001$  versus the control group, ## $P < 0.01$  versus the ethanol group (n=3).

**Supplementary Fig. 3 SalA or Torin1 induces the activation of autophagy.** AML-12 cells were pretreated with SalA (50  $\mu$ M) or Torin1 (100 nM) for 6 h and then exposed to ethanol (100 mM) for 24 h. The protein levels of LAMP-2 and RAB7 were evaluated by Western blotting. \*\* $P < 0.01$  versus the control group, # $P < 0.05$  versus the ethanol group (n=3).

**Supplementary Fig. 4 SalA regulates SIRT1 expression.** AML-12 cells were incubated with or without 50  $\mu$ M SalA for 6 h and then with or without 100 mM ethanol for 24 h. The SIRT1 protein level in cellular lysates was analyzed by Western blotting. \* $P < 0.05$  versus the control group, \*\* $P < 0.01$  versus the control

group, # $P < 0.05$  versus the ethanol group (n=3).

### Supplementary Figure 1

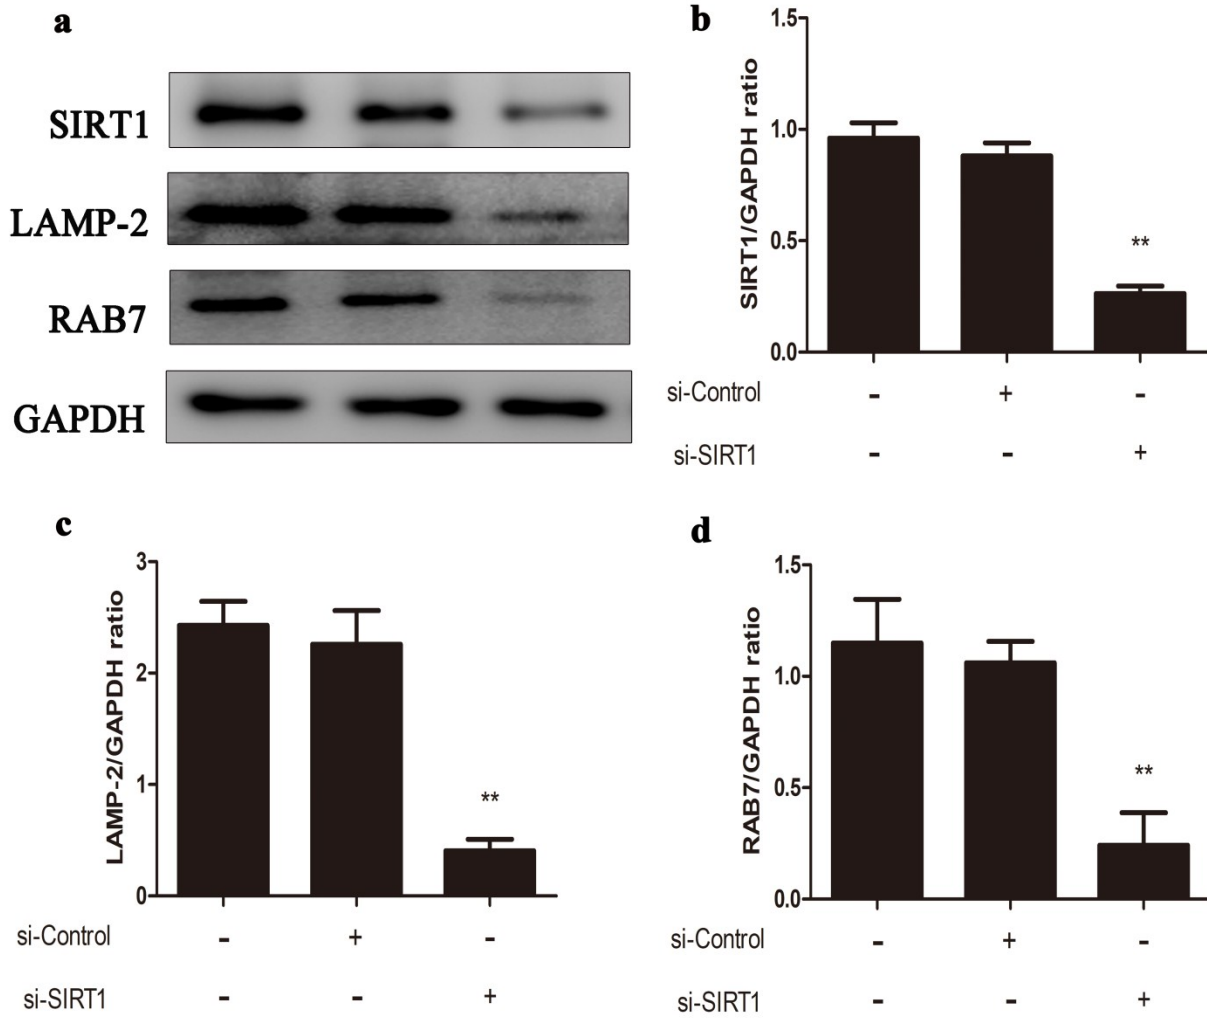

Fig S1.

Supplementary Fig. 2

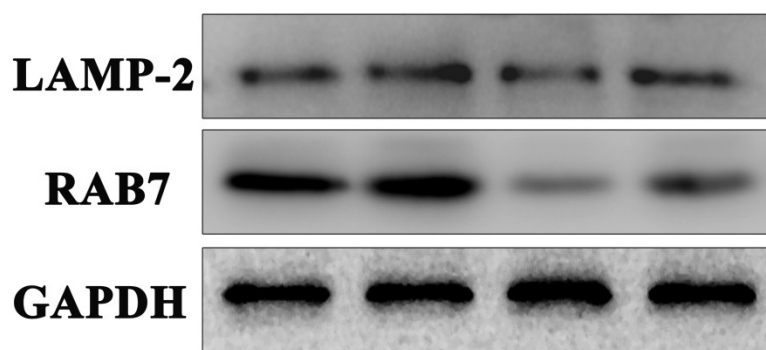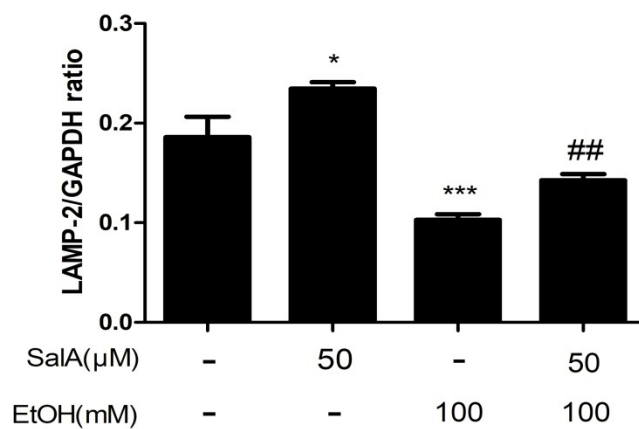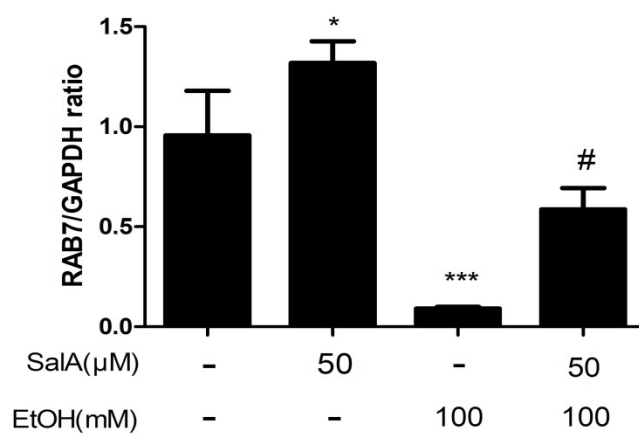

Fig S2.

Supplementary Fig. 3

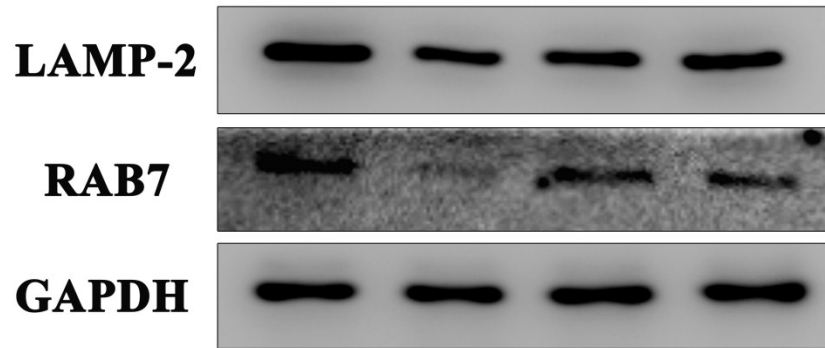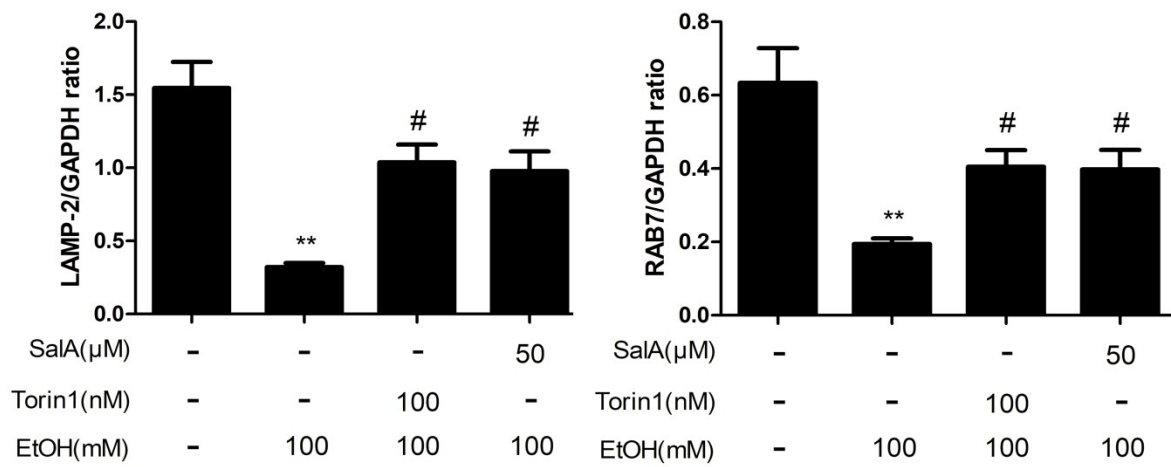

Fig S3.

**Supplementary Fig. 4**

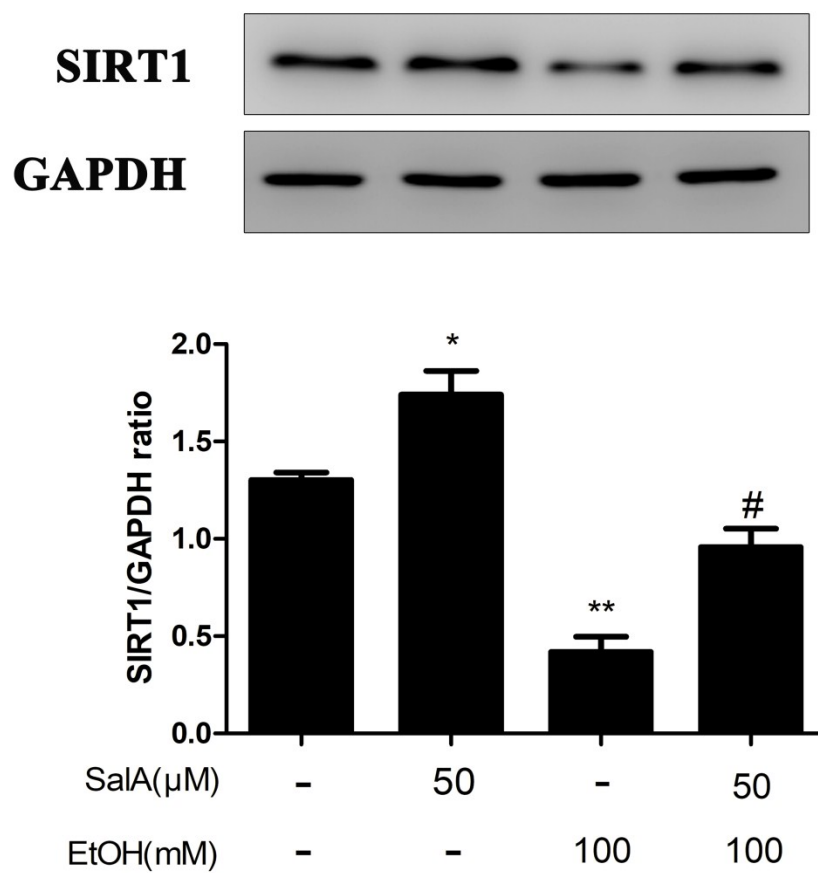

Fig S4.
